# Supplementary material for: A sulfur monoxide complex of platinum fluoride with a positively charged ligand
Source: Royal Society of Chemistry journal article supplement (doi:10.1039/d3ra01932b), 2023-01-01
Supplement: d3ra01932b1.pdf [file d3ra01932b1.pdf]

**Supporting Information**  
**for**  
**Sulfur monoxide complex of platinum fluoride with a positively**  
**charged ligand**

Deji Leng,<sup>a,b</sup> Zhixin Xiong,<sup>a,b</sup> Jingwen Hu,<sup>a,b</sup> Tiejian Zhu,<sup>a</sup> Xiuting Chen,<sup>a</sup> Yu Gong<sup>\*a</sup>

<sup>a</sup> Department of Radiochemistry, Shanghai Institute of Applied Physics, Chinese Academy of  
Sciences, Shanghai 201800, China

<sup>b</sup> School of Nuclear Science and Technology, University of Chinese Academy of Sciences,  
Beijing 100049, China

\*E-mail: [gongyu@sinap.ac.cn](mailto:gongyu@sinap.ac.cn).

## Additional Experimental and Theoretical Results

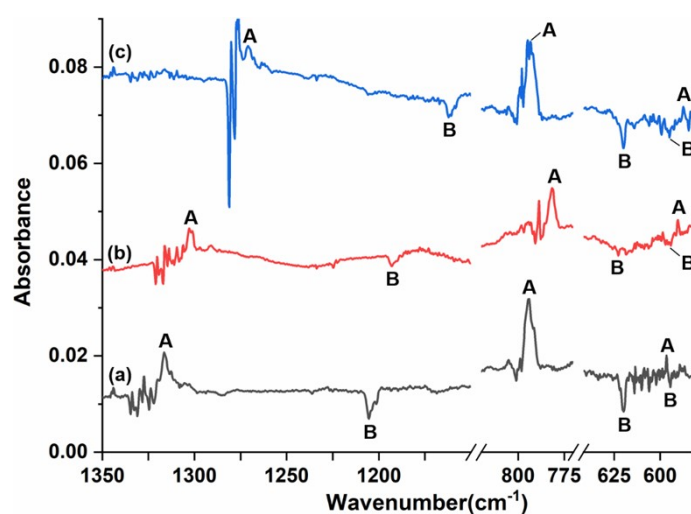

**Figure S1.** Infrared difference spectra in the 1350-1150, 820-770 and 640-585  $\text{cm}^{-1}$  regions from codeposition of laser-ablated platinum atoms and isotopically labeled  $\text{SOF}_2$  in solid argon at 4 K (spectra taken after 25 K annealing minus spectra taken after  $\lambda > 220$  nm irradiation): (a) 0.5%  $\text{SOF}_2$ , (b) 0.5%  $^{34}\text{SOF}_2$ , (c) 0.5%  $\text{S}^{18}\text{OF}_2$ . Labels A and B denote the  $\text{Pt}(\text{SOF}_2)$  and  $\text{PtF}_2(\eta^1\text{-SO})$  products, respectively.

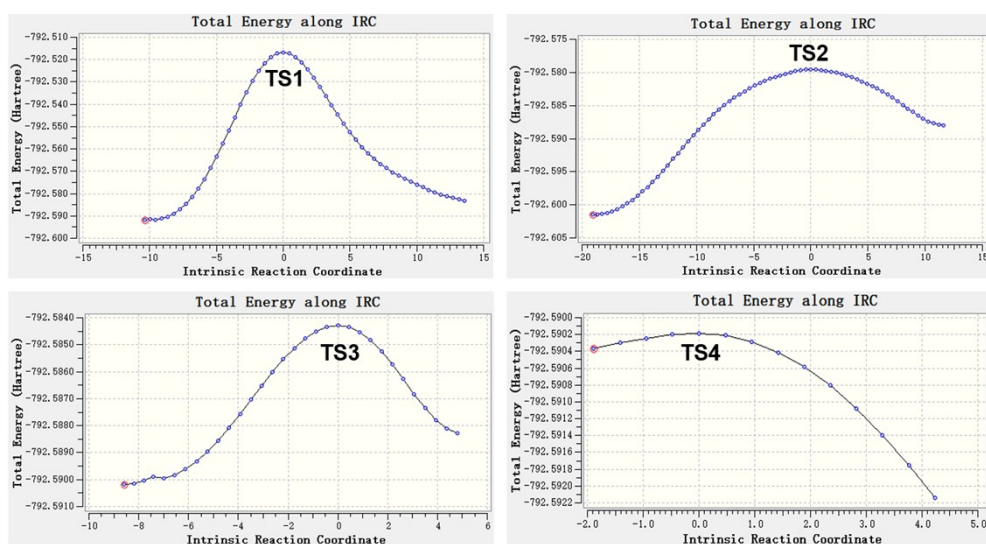

**Figure S2.** IRC plots of TS1-4 associated with the structural transformation as shown in the potential energy profile.

**Table S1.** Experimental infrared absorptions (cm<sup>-1</sup>) of Pt(SOF<sub>2</sub>) and PtF<sub>2</sub>(η<sup>1</sup>-SO) in solid argon.

|                                       | mode                | SOF <sub>2</sub>    | <sup>34</sup> SOF <sub>2</sub> | S <sup>18</sup> OF <sub>2</sub> |
|---------------------------------------|---------------------|---------------------|--------------------------------|---------------------------------|
|                                       | S-O str.            | 1316.4 <sup>a</sup> | 1302.8 <sup>a</sup>            | 1270.8 <sup>a</sup>             |
| Pt(SOF <sub>2</sub> )                 | sym.F-S-F str.      | 794.3 <sup>a</sup>  | 781.5 <sup>a</sup>             | 793.4 <sup>a</sup>              |
|                                       | wagging             | 596.6               | 590.6                          | 587.5                           |
|                                       | S-O str.            | 1205.4              | 1193.0                         | 1162.0                          |
| PtF <sub>2</sub> (η <sup>1</sup> -SO) | antisym.F-Pt-F str. | 619.8               | 622.1                          | 619.6                           |
|                                       | sym.F-Pt-F str.     | 594.9               | 594.7                          | 594.8                           |

<sup>a</sup> Determined from the infrared difference spectrum as they are partially covered by the SOF<sub>2</sub> precursor bands.

**Table S2.** Orbital composition of the S–O and Pt–S bonds in PtF<sub>2</sub>( $\eta^1$ -SO) from NBO calculations at the B3LYP/6-311+G(3df)/SDD level.

|      | bond type  | % of NBO on each atom | % of each hybrid in the NBO from each atom |       |       |      |
|------|------------|-----------------------|--------------------------------------------|-------|-------|------|
|      |            |                       | s                                          | p     | d     | f    |
| S-O  | $\pi$      | O (68.54)             | 0.00                                       | 99.25 | 0.74  | 0.01 |
|      |            | S (31.46)             | 0.00                                       | 98.05 | 1.86  | 0.09 |
| S-O  | $\sigma$   | O (68.63)             | 25.92                                      | 72.51 | 1.55  | 0.02 |
|      |            | S (31.37)             | 16.87                                      | 80.95 | 2.04  | 0.14 |
| Pt-S | $\sigma$   | S (47.90)             | 6.23                                       | 91.88 | 1.84  | 0.06 |
|      |            | Pt (52.10)            | 21.51                                      | 0.21  | 78.28 | -    |
| S-O  | $\pi^*$    | O (31.46)             | 0.00                                       | 99.25 | 0.74  | 0.01 |
|      |            | S (68.54)             | 0.00                                       | 98.05 | 1.86  | 0.09 |
| Pt-S | $\sigma^*$ | S (52.10)             | 6.23                                       | 91.88 | 1.84  | 0.06 |
|      |            | Pt (47.90)            | 21.51                                      | 0.21  | 78.28 | -    |

**Table S3.** NPA charges of SO and Pt in the PtF<sub>2</sub>( $\eta^1$ -SO) complex calculated at different level of theory.

| functional | SO   | Pt   |
|------------|------|------|
| B3LYP      | 0.37 | 0.82 |
| M06        | 0.39 | 0.84 |
| M06-L      | 0.30 | 0.84 |
| PBE0       | 0.38 | 0.82 |
| TPSSh      | 0.33 | 0.81 |

**Table S4.** Vibrational frequencies and bond lengths of free SO and the SO ligand in PtF<sub>2</sub>( $\eta^1$ -SO) calculated at different level of theory.

| functional | SO in PtF <sub>2</sub> ( $\eta^1$ -SO) |                 | free SO                       |                 |
|------------|----------------------------------------|-----------------|-------------------------------|-----------------|
|            | frequency (cm <sup>-1</sup> )          | bond length (Å) | frequency (cm <sup>-1</sup> ) | bond length (Å) |
| B3LYP      | 1245.7                                 | 1.449           | 1157.3                        | 1.488           |
| M06        | 1309.3                                 | 1.438           | 1198.7                        | 1.479           |
| M06-L      | 1250.5                                 | 1.453           | 1167.5                        | 1.487           |
| PBE0       | 1286.6                                 | 1.441           | 1200.7                        | 1.478           |
| TPSSh      | 1224.3                                 | 1.457           | 1153.8                        | 1.491           |

**Cartesian coordinates for PtF<sub>2</sub>( $\eta^1$ -SO), Pt(SOF<sub>2</sub>) as well as the transition states and intermediates involved in the isomerization process obtained at the B3LYP/6-311+G(3df)/SDD level of theory. All of these species possess singlet ground states.**

**PtF<sub>2</sub>( $\eta^1$ -SO)**

|    |             |             |             |
|----|-------------|-------------|-------------|
| F  | 0.05974800  | 0.85788800  | 1.87175700  |
| O  | -1.21955600 | -2.36141200 | 0.00000000  |
| F  | 0.05974800  | 0.85788800  | -1.87175700 |
| S  | 0.05974800  | -1.68038900 | 0.00000000  |
| Pt | 0.09903900  | 0.38891700  | 0.00000000  |

**Pt(SOF<sub>2</sub>)**

|    |             |             |             |
|----|-------------|-------------|-------------|
| O  | -1.83055800 | -1.49863500 | 0.00000000  |
| F  | 0.22970800  | -1.97387700 | 1.15088100  |
| F  | 0.22970800  | -1.97387700 | -1.15088100 |
| S  | -0.46296900 | -1.11177300 | 0.00000000  |
| Pt | 0.22970800  | 0.83727200  | 0.00000000  |

**TS1 (-371.30 cm<sup>-1</sup>)**

|   |            |             |             |
|---|------------|-------------|-------------|
| O | 2.04892700 | -1.36713100 | -0.44702700 |
| F | 1.98916600 | 0.43737700  | 1.09510100  |
| F | 0.76315500 | 1.75206600  | -0.60024100 |
| S | 1.33087100 | -0.13122500 | -0.25971200 |

Pt -0.80072100 -0.08549200 0.04202400

**IM1**

O -1.41087700 -1.20191500 -0.24929500

F -2.29375800 1.12967000 -0.45153600

F 2.12868600 0.84452200 0.14756700

S -1.56792000 0.07511800 0.52532000

Pt 0.48537700 -0.11992700 -0.04711600

**TS2 (-80.26 cm<sup>-1</sup>)**

O 2.11617800 0.87071000 -0.90142500

F 2.02451400 -1.02074200 0.66588600

F -1.64364700 1.14689900 0.72603300

S 1.46568000 0.50170500 0.33548600

Pt -0.56164300 -0.20677400 -0.13697000

**IM2**

O 2.24033700 1.14508600 -0.54553400

F 1.38664500 -1.35864800 -0.09149500

F -1.90785200 1.10677800 0.07933600

S 1.54305500 0.37222500 0.44526000

Pt -0.48616300 -0.16473700 -0.03398000



**TS3 (-128.38 cm<sup>-1</sup>)**

|    |             |             |             |
|----|-------------|-------------|-------------|
| O  | -2.21540700 | -1.27977400 | -0.43672200 |
| F  | -0.88049100 | 1.72255100  | -0.13520000 |
| F  | 1.76653900  | -1.25997100 | 0.06303500  |
| S  | -1.58659900 | -0.25355700 | 0.35836300  |
| Pt | 0.45044100  | 0.12989600  | -0.02039200 |

**IM3**

|    |             |             |             |
|----|-------------|-------------|-------------|
| O  | 2.49809300  | -0.76561200 | -0.00053800 |
| F  | -0.46868300 | 1.98213200  | -0.00006800 |
| F  | -0.80987100 | -1.90626200 | 0.00026600  |
| S  | 1.60691700  | 0.37136400  | 0.00041300  |
| Pt | -0.43831300 | -0.00640700 | -0.00005200 |

**TS4 (-61.87 cm<sup>-1</sup>)**

|    |             |             |             |
|----|-------------|-------------|-------------|
| F  | -0.64264200 | 1.95503100  | -0.07262500 |
| O  | 2.54928600  | 0.56778600  | 0.19670400  |
| F  | -0.69826500 | -1.93134300 | 0.04050700  |
| S  | 1.58168800  | -0.44898200 | -0.14689800 |
| Pt | -0.43119400 | 0.03113100  | 0.01366400  |
